# Supplementary material
Source: publisher site journal article supplement (https://www.dovepress.com/article/392566)
Supplement: Supplementary file 1 [file get_supplementary_file.php]

# Supplementary material

The inclusion and exclusion criteria that were applied are provided in Table 1.

**Table S1: Inclusion and exclusion criteria.**

|  | **Inclusion criteria** | **Exclusion criteria** |
| --- | --- | --- |
| **Population** | Patients with symptomatic severe aortic stenosis who are:   - Inoperable - High surgical risk - Intermediate surgical risk - Low surgical risk | - Paediatric and adolescent patients. - Special patient groups (such as those with preoperative mitral regurgitation) |
| **Intervention** | TAVI (any access route or device type) | N/A |
| **Comparators** | - Medical management (inoperable patients) - Surgical aortic valve replacement (high, intermediate, and low risk) - TAVI | N/A |
| **Outcomes** | - Average cost per patient, and - At least one effectiveness outcome to be included | - Studies with no cost outcomes |
| **Study design** | Cost-utility studies | - Cost of illness studies |

## Systematic literature review: development of search terms

A combination of subject headings (where available) and free-text search terms was used. Search terms relating to TAVI (and synonyms) were combined with a pragmatic cost-effectiveness search filter (developed in-house). Using MEDLINE, this was compared with a published sensitive search filter, CADTH’s Economic Evaluations/Costs/Economic Models (Strings attached: CADTH database search filters [Internet]. Ottawa: CADTH; 2021. [cited 2021 September 23]. Available from: https://www.cadth.ca/strings-attached-cadths-database-search-filters) and the 341 additional studies retrieved by this filter were checked by the project lead (BK) and 10 studies were selected as relevant to the research question. An additional line was then added to the pragmatic search filter to ensure these 10 studies were retrieved.

The following databases were searched on 21 September 2021:

- Ovid MEDLINE(R) and Epub Ahead of Print, In-Process, In-Data-Review & Other Non-Indexed Citations and Daily 1946 to September 20, 2021
- Embase 1974 to 2021 September 20
- Econlit 1886 to September 16, 2021
- NHS EED via the CRD website (<https://www.crd.york.ac.uk/CRDWeb/>) Archive up to 31 March 2015
- The Tufts CEA Registry (<https://cevr.tuftsmedicalcenter.org/databases/cea-registry>) was also searched on 23 September 2021. Due to the limited search functionality available, 5 individual searches were conducted using free text terms only.

The pragmatic search filter was used for MEDLINE and Embase only, Econlit and NHS EED were searched using the TAVI terms only. No search limits were applied in any of the databases. For the search results found in each database/registry, see Table 2. All search results were imported into Endnote reference management software and deduplication was conducted using the Bramer et al method.(1)

**Table S2: Search results**

| **Database** | **Date Searched** | **Number of results retrieved** |
| --- | --- | --- |
| Ovid MEDLINE(R) and Epub Ahead of Print, In-Process, In-Data-Review & Other Non-Indexed Citations and Daily 1946 to September 20, 2021 | 21/09/21 | 351 |
| Embase 1974 to 2021 September 20 | 21/09/21 | 509 |
| Econlit 1886 to September 16, 202 | 21/09/21 | 11 |
| NHS EED via CRD | 21/09/21 | 33 |
| Tufts CEA Registry | 23/09/21 | 55 |
| Total number of references retrieved |  | 959 |
| **Total number of unique references (after duplicates removed)** |  | **646** |

## Systematic literature review: Search Strategies

### MEDLINE

Database: Ovid MEDLINE(R) and Epub Ahead of Print, In-Process, In-Data-Review & Other Non-Indexed Citations and Daily <1946 to September 20, 2021>

Search Strategy:

--------------------------------------------------------------------------------

1 exp Transcatheter Aortic Valve Replacement/ (7740)

2 ((transcatheter or surg*) adj1 aortic valve adj (implantation* or replacement* or implementation*)).tw. (11664)

3 (TAVI or TAVR or SAVR).tw. (8871)

4 SAPIEN.tw. (1702)

5 exp Aortic Valve Stenosis/ (45677)

6 (aortic stenos* or aortic valve stenos*).tw. (20604)

7 or/1-6 (56072)

8 Cost-benefit analysis/ (86332)

9 Economic value of life/ (5760)

10 Quality-adjusted life years/ (13760)

11 exp models, economic/ (15797)

12 cost utilit$.tw. (5166)

13 cost benefit$.tw. (11672)

14 cost minim$.tw. (1624)

15 cost effect$.tw. (149575)

16 economic evaluation$.tw. (12986)

17 ((economic* or cost*) adj2 outcome*).ti,ab. (14261)

18 or/8-17 (228175)

19 7 and 18 (351)

### EMBASE

Database: Embase <1974 to 2021 September 20>

Search Strategy:

--------------------------------------------------------------------------------

1 exp transcatheter aortic valve implantation/ (25414)

2 ((transcatheter or surg*) adj1 aortic valve adj (implantation* or replacement* or implementation*)).tw. (20869)

3 (TAVI or TAVR or SAVR).tw. (19278)

4 SAPIEN.tw. (4086)

5 exp aortic valve stenosis/ (4427)

6 (aortic stenos* or aortic valve stenos*).tw. (33223)

7 or/1-6 (52180)

8 "cost benefit analysis"/ (88115)

9 quality adjusted life year/ (29830)

10 economic model/ (2537)

11 cost utilit$.tw. (8147)

12 cost benefit$.tw. (16062)

13 cost minim$.tw. (2740)

14 cost effect$.tw. (205152)

15 economic evaluation$.tw. (18325)

16 ((economic* or cost*) adj2 outcome*).ti,ab. (22094)

17 or/8-16 (309437)

18 7 and 17 (509)

### ECONLIT

Database: Econlit <1886 to September 16, 2021>

Search Strategy:

--------------------------------------------------------------------------------

1 ((transcatheter or surg*) adj1 aortic valve adj (implantation* or replacement* or implementation*)).tw. (8)

2 (TAVI or TAVR or SAVR).tw. (10)

3 SAPIEN.tw. (0)

4 (aortic stenos* or aortic valve stenos*).tw. (3)

5 or/1-4 (11)

### NHS EED

| 1 | MeSH DESCRIPTOR Transcatheter Aortic Valve Replacement EXPLODE ALL TREES | 10 |
| --- | --- | --- |
| 2 | (((transcatheter or surg*) adj1 aortic valve adj (implantation* or replacement* or implementation*))) IN NHSEED | 14 |
| 3 | ((TAVI or TAVR or SAVR)) IN NHSEED | 5 |
| 4 | (SAPIEN) IN NHSEED | 1 |
| 5 | MeSH DESCRIPTOR Aortic Valve Stenosis EXPLODE ALL TREES | 103 |
| 6 | ((aortic stenos* or aortic valve stenos*)) IN NHSEED | 28 |
| 7 | #1 OR #2 OR #3 OR #4 OR #5 OR #6 | 112 |
|  | Manually checked search results for NHS EED records only as not possible to limit MeSH searches to single databases | 33 |

### TUFTS CEA REGISTRY

| Search 1 | Basic Search **Transcatheter Aortic Valve Replacement** in Methods | 11 |
| --- | --- | --- |
| Search 2 | Basic Search **Transcatheter Aortic Valve Implantation** in Methods | 19 |
| Search 3 | Basic Search **Transcatheter Aortic Valve Implementation** in Methods | 0 |
| Search 4 | Basic Search **Aortic Valve Stenosis** in Methods | 1 |
| Search 5 | Basic Search **Aortic Stenosis** in Methods | 24 |

## Systematic literature review: Identification of health technology assessment reports with economic evaluations

We sought to identify reports published by any of the following health technology assessment agencies:

- National Institute for Health and Care Excellence (NICE)
- Healthcare Improvement Scotland (HIS)
- Ireland’s Health Information and Quality Authority (HIQA)
- Canadian Agency for Drugs and Technology in Health (CADTH)
- Health Quality Ontario (HQO)
- Australia’s Medical Services Advisory Committee (MSAC)
- Haute Autorité de Santé (HAS)
- Norwegian Institute of Public Health (NIPH)
- Basque Office for Health Technology Assessment (OSTEBA)
- Zorginstituut (ZIT)
- The European Network for Health Technology Assessment (EUnetHTA)

Identification of reports with economic evaluations was a mixture of using known reports and searching agency-specific websites with basic keywords (aortic stenosis, TAVI, TAVR).

## Systematic literature review: identified studies

In total, 42 studies were identified. This included 30 studies from the 646 unique results identified through database searching.(2-31) A further 11 HTA agencies reports were identified from the grey literature,(32-42) and one extra study was identified via hand-searching of key journals.(43)

Amongst the studies excluded at the full text stage, a Belgian study provided the results of cost-effectiveness analyses but was excluded as it was not possible to infer if these represented cost-effective results or not.(44) Another study was excluded because it was not possible to categorise the risk group of the patients.(45)

## Variables for analysis: additional information

#### Device type

We extracted data on device manufacturer (Medtronic or Edwards), device model (e.g. SAPIEN 3, Evolut R, etc) and device type (balloon-expandable or self-expandable). Due to small numbers of studies using certain devices (particularly Medtronic devices, which are self-expandable), we grouped all self-expandable devices together. Due to advances in the design of balloon-expandable (Edwards) devices over successive generations, there is emerging evidence that the latest generation of devices (SAPIEN 3) have more favourable outcomes than previous generations (SAPIEN, SAPIEN XT). Therefore, we categorised balloon-expandable devices as SAPIEN 3 vs older SAPIEN devices.

#### Access route

For descriptive statistics this was grouped into four categories: 0% transfemoral, 70-85% transfemoral, 85-99% transfemoral and 100% transfemoral. These category definitions were used to provide approximately equal numbers in each category. For quantitative analyses, access route was used as a continuous variable, to avoid a loss of power(46).

#### Discount rate

We extracted data on both cost and benefit discount rates, which were found to be highly correlated. We categorised the data into two levels: <3 and >= 3%, representing low and high levels of discounting. Our univariate analyses showed that neither discount rate was associated with cost-effectiveness (with the exception of the ‘not reported’ category, which was associated with a lower probability of cost-effectiveness for both discount rates). We retained the benefit discount rate for further exploration. This is because SAVR and TAVI both have high upfront costs relative to low ongoing costs of care, hence the magnitude of the discounting of costs in the future is unlikely to be important. Conversely, as TAVI benefits occur in the long-term, the benefit discount rate may be more important.

#### Time horizon, model type, and deterministic/PSA

We categorised data on time horizon into three levels: <2 years, 2-10 years and 10+ years. Based on examination of the data, it was reasoned that 10+ years is likely to constitute a lifetime horizon in this population (e.g. for the low risk group the shortest ‘lifetime’ was 15 years), whilst <2 years is a short time horizon and 2-10 years intermediate.

Time horizon, model type, both discount rates, and if cost-effectiveness results were based on a deterministic analysis or the mean of probabilistic sensitivity analyses (PSAs) were found to be highly correlated, representing methodological clusters relating to the practices of particular research groups or decision agencies. Because of these strong correlations, we combined these variables into a single variable which captured the different methodological approaches to estimating cost-effectiveness. However, this gave a large number of categories with small numbers in each category, which was impractical for statistical estimates. As deterministic/PSA was not found to be significantly associated with cost-effectiveness (in univariable or multivariable analyses), we removed this variable from our analysis. As only two studies used a model and had a <2 year time horizon, we chose not to further differentiate these two studies by discount rate (actual discount rates used were 1.5% and 4% but are unlikely to impact on results due to the short time horizon). The resulting methodological variable had seven levels (as shown in Tables S5 and S6).

The p-values for chi-squared tests for the combinations of variables are shown in Table 3 for the original individual variables, and with the grouped methodological variables in Table 4.

**Table S3: Chi-squared statistics between predictors and the probability of being cost-effective (original methodological variables).**

|  | Risk group | Device type | Access route | Discount rate | | Model used | Time horizon | PSA |
| --- | --- | --- | --- | --- | --- | --- | --- | --- |
|  | Costs | Benefits |
| Cost-effective | 16.18 (0.095) | 10.39 (**0.034**) | 15.37 (0.052) | 6.45 (0.168) | 7.79 (0.100) | 2.36 (0.308) | 8.82 (0.066) | 11.17 (0.083) |
| Risk group |  | 21.12 (**0.020**) | 48.08 (**<0.01**) | 14.42 (0.155) | 13.70 (0.187) | 5.81 (0.325) | 28.63 (**<0.01**) | 15.66 (0.405) |
| Device type |  |  | 27.13 (0.298) | 16.73 (0.16) | 22.65 (**0.031**) | 2.91 (0.82) | 23.09 (**0.027**) | 10.09 (0.929) |
| Access route |  |  |  | 5.77 (0.673) | 8.12 (0.422) | 3.74 (0.442) | 7.40 (0.494) | 9.14 (0.690) |
| DR: Costs |  |  |  |  | 77.65 (**<0.01**) | 4.02 (0.134) | 13.67 (**<0.01**) | 55.34 (**<0.01**) |
| DR: Benefits |  |  |  |  |  | 5.30 (0.071) | 6.76 (0.149) | 33.76 (**<0.01**) |
| Model used |  |  |  |  |  |  | 10.42 (<**0.01**) | 68.00 (**<0.01**) |
| Time horizon |  |  |  |  |  |  |  | **25.17**  **(<0.01)** |

P-values are given in parentheses. Bold text indicates significance at p < 0.05. PSA: If results are based on a probabilistic analysis. DR: Discount rate

**Table S4: Chi-squared statistics between predictors and the probability of being cost-effective (grouped methodological variables).**

|  | Risk group | Device type | Access route | Methodological approach |
| --- | --- | --- | --- | --- |
| Cost-effective | 16.18 (0.095) | 10.39 (**0.034**) | 15.37 (0.052) | 26.53 (<**0.01**) |
| Risk group |  | 21.12 (**0.020**) | 48.08 (**<0.01**) | 43.45 (0.053) |
| Device type |  |  | 14.46 (0.070) | 19.97 (0.068) |
| Access route |  |  |  | 19.44 (0.728) |

P-values are given in parentheses. Bold text indicates significance at p < 0.05.

## Statistical modelling

Models were fit using penalised logistic regression (using the ‘glmnet’ model engine in the R package ‘parsnip’). This model requires estimates for both the penalisation (regularisation) parameter and the ‘mixture’ parameter. This latter parameter takes a value between 0 and 1 and may be interpreted as the proportion of lasso regression that is used (values of 0 and 1 provide ridge regression and lasso regression respectively. Values in between provide elastic net models). Both parameters were identified via a two-dimensional grid search using 10 values per parameter (100 values in total), with models fit to a random sample of 75% of the data and assessed on the remaining 25%. This allowed for an ‘external’ assessment of the values to use. To avoid results being driven by any quirks of the random 75%, the process was repeated (bootstrapped) 100 times and the average results used. The parameters providing the best estimates (based on the area under the receiver operating characteristic curve) were used to generate the final model estimates.

Linear regression analyses used the ‘glm’ function in R. For all analyses a p-value less than 0.05 was used to signify statistical significance.

**Table S5: Results of the penalised logistic regression model**

| **Variable** | **Count** | **Odds ratio** |
| --- | --- | --- |
| **Risk level** |  |  |
| Inoperable | 16 | Reference |
| High | 17 | 0.25 |
| High or inoperable | 3 | 1.25 |
| Intermediate | 16 | 0.29 |
| Intermediate or low | 2 | N/S |
| Low | 10 | 1.33 |
| **Access route*:**  20% increase in transfemoral |  | N/S |
| **Device category** |  |  |
| Medtronic valves | 12 | Reference |
| Older generation SAPIEN | 34 | N/S |
| SAPIEN 3 | 18 | 3.88 |
| **Modelling methods** |  |  |
| Did not use a model | 9 | Reference |
| Model used, time horizon < 2 years | 1 | 0.29 |
| Model used, time horizon 2-10 years, discount rate >= 3% | 11 | N/S |
| Model used, time horizon 2-10 years, discount rate not reported | 2 | 2.02 |
| Model used, lifetime horizon, discount rate < 3% | 13 | N/S |
| Model used, lifetime horizon, discount rate >= 3% | 23 | N/S |
| Model used, lifetime horizon, discount rate not reported | 5 | N/S |

N/S: Not significantly different to one (no effect)

*Included as a continuous variable

**Table S6: Impact of study characteristics on the incremental QALYs with TAVI**

| **Variable** | **Incremental QALY gains (standard error)** | |
| --- | --- | --- |
| **Univariate** | **Multivariate** |
| **Risk level (comparator)** |  |  |
| Inoperable (reference) | 1.01 (0.10) | Reference |
| High | **0.25 (0.14)** | **0.19 (0.13)** |
| High or inoperable | 0.92 (0.25) | 1.13 (0.23) |
| Intermediate | **0.22 (0.15)** | **-0.09 (0.15)** |
| Intermediate or low | 0.21 (0.42) | 0.43 (0.37) |
| Low | **0.25 (0.17)** | **-0.36 (0.18)** |
| **Access route:**  20% increase in transfemoral | **0.09 (0.05)** | **1.03 (0.04)** |
| Transapical | 0.09 | *Included as a continuous variable* |
| Mixed (70 % - 85% transfemoral) | 0.31 |
| Mixed (85 % - 99% transfemoral) | 0.54 |
| Transfemoral | 0.64 |
| Not reported | 0.06 |
| **Device category** |  |  |
| Medtronic valves (reference) | 0.45 (0.15) | Reference |
| Older generation SAPIEN | 0.47 (0.18) | 0.72 (0.15) |
| SAPIEN 3 | 0.49 (0.2) | 0.94 (0.15) |
| **Modelling methods** |  |  |
| Did not use a model (reference) | 0.26 (0.18) | Reference |
| Model used, time horizon < 2 years | 0.07 (0.56) | 1.02 (0.36) |
| Model used, time horizon 2-10 years, discount rate >= 3% | 0.61 (0.24) | **0.54 (0.20)** |
| Model used, time horizon 2-10 years, discount rate not reported | 0.51 (0.41) | 0.7 (0.27) |
| Model used, lifetime horizon, discount rate < 3% | 0.63 (0.23) | **1.28 (0.16)** |
| Model used, lifetime horizon, discount rate >= 3% | 0.45 (0.21) | 0.99 (0.14) |
| Model used, lifetime horizon, discount rate not reported | 0.29 (0.30) | 0.46 (0.20) |

For the multivariable model, there is a single reference category which is inoperable risk, self-expandable device, 0% transfemoral access and no model used (incremental QALYs 0.95). Bold text indicates statistical significance at p < 0.05.

## References

1. Bramer, W. M., Giustini, D., de Jonge, G. B., Holland, L., & Bekhuis, T. (2016). De-duplication of database search results for systematic reviews in EndNote. *Journal of the Medical Library Association: JMLA*, *104*(3), 240.

2. Baron SJ, Wang K, House JA, et al. Cost-Effectiveness of Transcatheter Versus Surgical Aortic Valve Replacement in Patients With Severe Aortic Stenosis at Intermediate Risk. Circulation. 2019; 139: 877-88.

3. Brecker S, Mealing S, Padhiar A, et al. Cost-utility of transcatheter aortic valve implantation for inoperable patients with severe aortic stenosis treated by medical management: a UK cost-utility analysis based on patient-level data from the ADVANCE study. Open Heart. 2014; 1: e000155.

4. Doble B, Blackhouse G, Goeree R, et al. Cost-effectiveness of the Edwards SAPIEN transcatheter heart valve compared with standard management and surgical aortic valve replacement in patients with severe symptomatic aortic stenosis: a Canadian perspective. Journal of Thoracic & Cardiovascular Surgery. 2013; 146: 52-60.e53.

5. Fairbairn TA, Meads DM, Hulme C, et al. The cost-effectiveness of transcatheter aortic valve implantation versus surgical aortic valve replacement in patients with severe aortic stenosis at high operative risk. Heart. 2013; 99: 914-20.

6. Ferreira-Gonzalez I, Serra V, Abdul O, et al. Evidence of the cost-effectiveness of Edwards Sapien transcatheter aortic valve implantation (TAVI) in high-risk patients with symptomatic aortic stenosis in Spain: Preliminary results. [Spanish]. Pharmacoeconomics - Spanish Research Articles. 2013; 10(1): 1-13.

7. Gada H, Agarwal S, Marwick TH. Perspective on the cost-effectiveness of transapical aortic valve implantation in high-risk patients: Outcomes of a decision-analytic model. Annals of Cardiothoracic Surgery. 2012; 1: 145-55.

8. Gada H, Kapadia SR, Tuzcu EM, et al. Markov model for selection of aortic valve replacement versus transcatheter aortic valve implantation (without replacement) in high-risk patients. American Journal of Cardiology. 2012; 109: 1326-33.

9. Geisler BP, Huygens SA, Reardon MJ, et al. Cost-Effectiveness and Projected Survival of Self-Expanding Transcatheter Versus Surgical Aortic Valve Replacement for High Risk Patients in a European Setting: A Dutch Analysis Based on the CoreValve High Risk Trial. Structural Heart. 2017; 1(5-6): 267-74.

10. Geisler BP, Jorgensen TH, Thyregod HGH, et al. Cost-effectiveness of transcatheter versus surgical aortic valve replacement in patients at lower surgical risk: results from the NOTION trial. Eurointervention. 2019; 15: e959-e67.

11. Goodall G, Lamotte M, Ramos M, et al. Cost-effectiveness analysis of the SAPIEN 3 TAVI valve compared with surgery in intermediate-risk patients. Journal of Medical Economics. 2019; 22: 289-96.

12. Hancock-Howard RL, Feindel CM, Rodes-Cabau J, et al. Cost effectiveness of transcatheter aortic valve replacement compared to medical management in inoperable patients with severe aortic stenosis: Canadian analysis based on the PARTNER Trial Cohort B findings. Journal of Medical Economics. 2013; 16: 566-74.

13. Health Quality O. Transcatheter Aortic Valve Implantation for Treatment of Aortic Valve Stenosis: A Health Technology Assessment. Ontario Health Technology Assessment Series. 2016; 16: 1-94.

14. Inoue S, Nakao K, Hanyu M, et al. Cost-Effectiveness of Transcatheter Aortic Valve Implantation Using a Balloon-Expandable Valve in Japan: Experience From the Japanese Pilot Health Technology Assessment. Value in Health Regional Issues. 2020; 21: 82-90.

15. Kodera S, Kiyosue A, Ando J, et al. Cost effectiveness of transcatheter aortic valve implantation in patients with aortic stenosis in Japan. Journal of Cardiology. 2018; 71: 223-29.

16. Kuntjoro I, Tay E, Hon J, et al. Cost-Effectiveness of Transcatheter Aortic Valve Implantation in Intermediate and Low Risk Severe Aortic Stenosis Patients in Singapore. Annals of the Academy of Medicine, Singapore. 2020; 49: 423-33.

17. Lorenzoni V, Barbieri G, Saia F, et al. The cost-effectiveness of transcatheter aortic valve implantation: exploring the Italian National Health System perspective and different patient risk groups. European Journal of Health Economics. 2021; 21: 21.

18. Murphy A, Fenwick E, Toff WD, et al. Transcatheter aortic valve implantation for severe aortic stenosis: the cost-effectiveness case for inoperable patients in the United Kingdom. International Journal of Technology Assessment in Health Care. 2013; 29: 12-19.

19. Orlando R, Pennant M, Rooney S, et al. Cost-effectiveness of transcatheter aortic valve implantation (TAVI) for aortic stenosis in patients who are high risk or contraindicated for surgery: a model-based economic evaluation. Health Technology Assessment (Winchester, England). 2013; 17: 1-86.

20. Pinar E, Garcia de Lara J, Hurtado J, et al. Cost-effectiveness analysis of the SAPIEN 3 transcatheter aortic valve implant in patients with symptomatic severe aortic stenosis. Revista Espanola de Cardiologia. 2021; 17: 17.

21. Reynolds MR, Lei Y, Wang K, et al. Cost-Effectiveness of Transcatheter Aortic Valve Replacement With a Self-Expanding Prosthesis Versus Surgical Aortic Valve Replacement. Journal of the American College of Cardiology. 2016; 67: 29-38.

22. Reynolds MR, Magnuson EA, Lei Y, et al. Cost-effectiveness of transcatheter aortic valve replacement compared with surgical aortic valve replacement in high-risk patients with severe aortic stenosis: results of the PARTNER (Placement of Aortic Transcatheter Valves) trial (Cohort A). Journal of the American College of Cardiology. 2012; 60: 2683-92.

23. Reynolds MR, Magnuson EA, Wang K, et al. Cost-effectiveness of transcatheter aortic valve replacement compared with standard care among inoperable patients with severe aortic stenosis: results from the placement of aortic transcatheter valves (PARTNER) trial (Cohort B). Circulation. 2012; 125: 1102-09.

24. Simons CT, Cipriano LE, Shah RU, et al. Transcatheter aortic valve replacement in nonsurgical candidates with severe, symptomatic aortic stenosis: a cost-effectiveness analysis. Circulation Cardiovascular Quality & Outcomes. 2013; 6: 419-28.

25. Tam DY, Azizi PM, Fremes SE, et al. The cost-effectiveness of transcatheter aortic valve replacement in low surgical risk patients with severe aortic stenosis. European Heart Journal Quality of Care & Clinical Outcomes. 2020; 09: 09.

26. Tam DY, Hughes A, Fremes SE, et al. A cost-utility analysis of transcatheter versus surgical aortic valve replacement for the treatment of aortic stenosis in the population with intermediate surgical risk. Journal of Thoracic & Cardiovascular Surgery. 2018; 155: 1978-88.e71.

27. Tam DY, Hughes A, Wijeysundera HC, et al. Cost-Effectiveness of Self-Expandable Transcatheter Aortic Valves in Intermediate-Risk Patients. Annals of Thoracic Surgery. 2018; 106: 676-83.

28. Zhou J, Liew D, Duffy SJ, et al. Cost-effectiveness of transcatheter aortic valve implantation compared to surgical aortic valve replacement in the intermediate surgical risk population. International Journal of Cardiology. 2019; 294: 17-22.

29. Zhou JY, Liew D, Duffy SJ, et al. Cost-Effectiveness of Transcatheter Versus Surgical Aortic Valve Replacement in Low-Risk Patients With Severe Aortic Stenosis. Heart, Lung & Circulation. 2021; 30: 547-54.

30. Tarride JE, Luong T, Goodall G, et al. A Canadian cost-effectiveness analysis of SAPIEN 3 transcatheter aortic valve implantation compared with surgery, in intermediate and high-risk severe aortic stenosis patients. Clinicoeconomics & Outcomes Research. 2019; 11: 477-86.

31. Watt M, Mealing S, Eaton J, et al. Cost-effectiveness of transcatheter aortic valve replacement in patients ineligible for conventional aortic valve replacement. Heart. 2012; 98: 370-76.

32. Authority HIaQ. Health Technology Assessment of transcatheter aortic valve implantation (TAVI) in patients with severe symptomatic aortic stenosis at low and intermediate risk of surgical complications. 2019.

33. Group HISatSHT. Transcatheter aortic valve implantation (TAVI) for the treatment of patients with severe symptomatic aortic stenosis who are at intermediate surgical risk. 2019.

34. Wales HT. Evidence Appraisal Report: Transcatheter Aortic Valve implantation to treat people with severe symptomatic aortic stenosis, who are at intermediate surgical risk. 2020.

35. Sante HAD. Medtronic CoreValve Evolut R et Evolut PRO: Traitement de la sténose aortique sévère symptomatique en France chez les patients à faible risque chirurgical. 2021.

36. Sante HAD. SAPIEN 3: Traitement de la sténose aortique sévère symptomatique en France chez les patients à faible risque chirurgical. 2021.

37. Sante HAD. Système Medtronic Corevalve. 2017.

38. Sehatzadeh S, Doble B, Xie F, et al. Transcatheter aortic valve implantation (TAVI) for treatment of aortic valve stenosis: an evidence-based analysis (part B). Ontario health technology assessment series. 2012; 12: 1.

39. Committee MSA. Public summary document: application no. 1361.2: transcatheter aortic valve implantation via transfemoral delivery. Canberra (ACT): Medical Services Advisory Committee. 2016.

40. Himmels JPW, Flottorp SA, Stoinska-Schneider AK, et al. Transcatheter aortic valve implantation (TAVI) versus surgical aortic valve replacement (SAVR) for patients with severe aortic stenosis and low surgical risk and across surgical risk groups: a health technology assessment. 2021.

41. Fagerlund BC, Stoinska-Schneider A, Lauvrak V, et al. Health technology assessment of Transcatether aortic valve implantation (TAVI) as treatment of patients with severe aortic stenosis and intermediate surgical risk–Part 2. Health economic evaluation. 2019.

42. Bayón J, Gutiérrez A, del Pino MM, et al. Análisis coste-efectividad del recambio valvular aórtico mediante prótesis valvular percutánea frente al tratamiento quirúrgico habitual. Ministerio de Sanidad, Servicios Sociales e Igualdad; Servicio de Evaluación de Tecnologías Sanitarias del País Vasco. Informes de Evaluación de Tecnologías Sanitarias: OSTEBA. 2014.

43. Gilard M, Eltchaninoff H, Iung B, et al. Cost-Effectiveness Analysis of SAPIEN 3 Transcatheter Aortic Valve Implantation Procedure Compared With Surgery in Patients With Severe Aortic Stenosis at Low Risk of Surgical Mortality in France. Value in Health. 2021.

44. Neyt M, Van Brabandt H, Devriese S, et al. A cost-utility analysis of transcatheter aortic valve implantation in Belgium: focusing on a well-defined and identifiable population. BMJ Open. 2012; 2.

45. Ribera A, Slof J, Andrea R, et al. Transfemoral transcatheter aortic valve replacement compared with surgical replacement in patients with severe aortic stenosis and comparable risk: cost-utility and its determinants. International Journal of Cardiology. 2015; 182: 321-28.

46. Collins GS, Ogundimu EO, Cook JA, et al. Quantifying the impact of different approaches for handling continuous predictors on the performance of a prognostic model. Statistics in medicine. 2016; 35: 4124-35.
